# Supplementary material for: The devil in the details: lessons from Li 6 PS 5 X for robust high-throughput workflows
Source: Royal Society of Chemistry journal article supplement (doi:10.1039/d4ta06603k), 2024-11-14
Supplement: d4ta06603k1.pdf [file d4ta06603k1.pdf]

Supplementary Information for:

The Devil in the Details: Lessons from  $\text{Li}_6\text{PS}_5\text{X}$   
for Robust High-Throughput Workflows

Asif Iqbal Bhatti<sup>1,2</sup>, Sandeep Kumar<sup>1,2</sup>, Catharina Jaeken<sup>3</sup>, Michael  
Sluydts<sup>3</sup>, Danny E.P. Vanpoucke<sup>1,4</sup>, and Stefaan Cottenier<sup>\*1,2</sup>

<sup>1</sup>Department of Electromechanical, Systems and Metal Engineering,  
Ghent University, Belgium

<sup>2</sup>Center for Molecular Modeling, Ghent University, Belgium

<sup>3</sup>ePotentia, Belgium

<sup>4</sup>Hasselt University and imec, Institute for Materials Research  
(imo-imomec), Quantum & Artificial intelligence design Of Materials  
(QuATOMs), Belgium

November 14, 2024

---

\*Corresponding author: [stefaan.cottenier@ugent.be](mailto:stefaan.cottenier@ugent.be)

# 1 Supplementary Information

All data used in this paper are available at <https://doi.org/10.5281/zenodo.13744522> (cif files as well as VASP input and output files). A selection of these data and some additional pictures are listed in this Supplementary Information file.

## 1.1 Isovalent crystals

Table S1: Isovalent analog crystals.  $\Delta E_{\text{null}}$  values in eV/atom when the crystal is kept to be cubic and when a random distortion followed by a full geometry optimization is applied.

| Crystals              | cubic | distorted | Crystals              | cubic | distorted | Crystals                           | cubic | distorted |
|-----------------------|-------|-----------|-----------------------|-------|-----------|------------------------------------|-------|-----------|
| Li24Te2NiY1S16S4Cl4   | 0.36  | 0.30      | Li24Ir2Os1Mn1S16S4Cl4 | 0.20  | 0.19      | Li24W2Sm1Pt1S16S4Cl4               | 0.18  | 0.14      |
| Li24Se2Mn1Re1S16S4Cl4 | 0.15  | 0.13      | Li24Se2Mo1Te1S16S4Cl4 | 0.15  | 0.11      | Li24Mo2Ta1V1S16S4Cl4               | 0.13  | 0.12      |
| Li24W2Mn1Hg1S16S4Cl4  | 0.13  | 0.11      | Li24P2V1As1S16S4Cl4   | 0.04  | 0.02      | Li24Re2Ge1Te1S16S4Cl4              | 0.13  | 0.11      |
| Li24Ru2Be1Se1S16S4Cl4 | 0.23  | 0.15      | Li24Mn2Ta1Ru1S16S4Cl4 | 0.14  | 0.14      | Li24Se2Mn1Te1S16S4Cl4              | 0.14  | 0.11      |
| Li24Mo2Mn1Pt1S16S4Cl4 | 0.15  | 0.13      | Li24Ru2Mn1V1S16S4Cl4  | 0.18  | 0.17      | Li24Se2Nb1W1S16S4Cl4               | 0.14  | 0.12      |
| Li24Nb2Ru1S16S4Cl4    | 0.14  | 0.11      | Li24Cr2Ir1P1S16S4Cl4  | 0.12  | 0.10      | Li24N2Mn1Ru1S16S4Cl4               | 0.40  | 0.36      |
| Li24Nb2Os1Te1S16S4Cl4 | 0.15  | 0.13      | Li24Pt2Mn1As1S16S4Cl4 | 0.14  | 0.12      | Li24Nb2Ru1Bi1S16S4Cl4              | 0.16  | 0.14      |
| Li24Os2Mn1Cr1S16S4Cl4 | 0.16  | 0.16      | Li24Re2Ti1Cr1S16S4Cl4 | 0.13  | 0.12      | Li24Mo2Pb1W1S16S4Cl4               | 0.14  | 0.13      |
| Li24Ru2Ce1Pd1S16S4Cl4 | 0.22  | 0.19      | Li24Ru2Ni1Cu1S16S4Cl4 | 0.44  | 0.39      | Li24Se2Mn1Be1S16S4Cl4              | 0.16  | 0.10      |
| Li24Ru2Pt1Ti1S16S4Cl4 | 0.17  | 0.14      | Li24Ir2Pt1Os1S16S4Cl4 | 0.23  | 0.21      | Li24Ru2W1Nd1S16S4Cl4               | 0.21  | 0.20      |
| Li24Rh2Se1Mn1S16S4Cl4 | 0.18  | 0.16      | Li24As2Se1V1S16S4Cl4  | 0.08  | 0.06      | Li24Cr2Eu1Ta1S16S4Cl4              | 0.27  | 0.24      |
| Li24W2S11Se1S16S4Cl4  | 0.12  | 0.09      | Li24Bi2Cr1Te1S16S4Cl4 | 0.14  | 0.10      | Li <sub>6</sub> PS <sub>5</sub> Cl | 0.09  | 0.02      |
| Li24Se2Mn1Pt1S16S4Cl4 | 0.17  | 0.12      | Li24Mn2W1Pb1S16S4Cl4  | 0.11  | 0.10      |                                    |       |           |
| Li24Re2P1Ta1S16S4Cl4  | 0.13  | 0.12      | Li24Mo2Re1Ti1S16S4Cl4 | 0.15  | 0.13      |                                    |       |           |
| Li24Mo2Yb1W1S16S4Cl4  | 0.13  | 0.12      | Li24Re2W1Ni1S16S4Cl4  | 0.16  | 0.14      |                                    |       |           |
| Li24Pt2C1Re1S16S4Cl4  | 0.20  | 0.17      | Li24Sb2Re1Sn1S16S4Cl4 | 0.10  | 0.08      |                                    |       |           |
| Li24Sb2Ni1r1S16S4Cl4  | 0.35  | 0.31      | Li24Os2Hf1Re1S16S4Cl4 | 0.19  | 0.18      |                                    |       |           |
| Li24Os2Ca1W1S16S4Cl4  | 0.21  | 0.17      | Li24V2Mn1Mo1S16S4Cl4  | 0.11  | 0.09      |                                    |       |           |
| Li24Nb2Os1Ir1S16S4Cl4 | 0.17  | 0.16      | Li24Cr2Re1Ru1S16S4Cl4 | 0.14  | 0.13      |                                    |       |           |
| Li24Se2Cr1Gd1S16S4Cl4 | 0.31  | 0.28      | Li24Re2Ru1Ti1S16S4Cl4 | 0.17  | 0.16      |                                    |       |           |
| Li24Te2Cr1Zn1S16S4Cl4 | 0.13  | 0.08      | Li24Mo2Re1Fe1S16S4Cl4 | 0.16  | 0.15      |                                    |       |           |
| Li24Ru2Cr1Pt1S16S4Cl4 | 0.20  | 0.18      | Li24Te2Hf1Mo1S16S4Cl4 | 0.15  | 0.12      |                                    |       |           |
| Li24Ta2Se1Cr1S16S4Cl4 | 0.12  | 0.10      | Li24Ir2W1Re1S16S4Cl4  | 0.20  | 0.18      |                                    |       |           |
| Li24Re2Se1Yb1S16S4Cl4 | 0.16  | 0.15      | Li24Mo2Ni1Ru1S16S4Cl4 | 0.39  | 0.36      |                                    |       |           |
| Li24W2Rh1Cl1S16S4Cl4  | 0.16  | 0.14      | Li24Mo2Ag1Bi1S16S4Cl4 | 0.14  | 0.10      |                                    |       |           |
| Li24Os2Pt1Zr1S16S4Cl4 | 0.21  | 0.19      | Li24Te2Pd1Co1S16S4Cl4 | 0.17  | 0.11      |                                    |       |           |
| Li24Mn2Te1Cd1S16S4Cl4 | 0.15  | 0.11      | Li24As2Bi1P1S16S4Cl4  | 0.11  | 0.03      |                                    |       |           |
| Li24W2Al1As1S16S4Cl4  | 0.08  | 0.05      | Li24Cr2Rh1Re1S16S4Cl4 | 0.14  | 0.12      |                                    |       |           |
| Li24Cr2Hf1Ce1S16S4Cl4 | 0.16  | 0.10      | Li24Co2W1Te1S16S4Cl4  | 0.16  | 0.14      |                                    |       |           |
| Li24W2Os1Te1S16S4Cl4  | 0.16  | 0.14      | Li24Ru2Bi1Fe1S16S4Cl4 | 0.19  | 0.18      |                                    |       |           |
| Li24Re2Tb1Pt1S16S4Cl4 | 0.19  | 0.16      | Li24Ta2Te1W1S16S4Cl4  | 0.13  | 0.11      |                                    |       |           |
| Li24Ta2Se1V1S16S4Cl4  | 0.11  | 0.09      | Li24Mo2Ru1Zn1S16S4Cl4 | 0.18  | 0.13      |                                    |       |           |
| Li24Fe2Re1Mn1S16S4Cl4 | 0.16  | 0.15      | Li24Te2Ba1Mo1S16S4Cl4 | 0.20  | 0.12      |                                    |       |           |
| Li24Te2Mn1Er1S16S4Cl4 | 0.14  | 0.11      | Li24V2Os1W1S16S4Cl4   | 0.13  | 0.12      |                                    |       |           |
| Li24Mn2Bi1Pt1S16S4Cl4 | 0.15  | 0.12      | Li24Mn2W1Cu1S16S4Cl4  | 0.13  | 0.10      |                                    |       |           |
| Li24Ta2Re1Ti1S16S4Cl4 | 0.12  | 0.11      | Li24Rh2Te1Mo1S16S4Cl4 | 0.17  | 0.14      |                                    |       |           |
| Li24Re2W1Tm1S16S4Cl4  | 0.16  | 0.14      | Li24Ru2Se1Ni1S16S4Cl4 | 0.21  | 0.19      |                                    |       |           |
| Li24N2W1Ta1S16S4Cl4   | 0.37  | 0.34      | Li24Pt2Cr1Ru1S16S4Cl4 | 0.19  | 0.17      |                                    |       |           |
| Li24W2Mn1Os1S16S4Cl4  | 0.15  | 0.14      | Li24Sb2Te1Pb1S16S4Cl4 | 0.11  | 0.08      |                                    |       |           |
| Li24Se2Nb1Ir1S16S4Cl4 | 0.17  | 0.14      | Li24Se2Rh1Ru1S16S4Cl4 | 0.20  | 0.15      |                                    |       |           |

## 1.2 Simulated XRD spectrum of $\beta$ -Li<sub>3</sub>PS<sub>4</sub> and $\beta'$ -Li<sub>3</sub>PS<sub>4</sub>

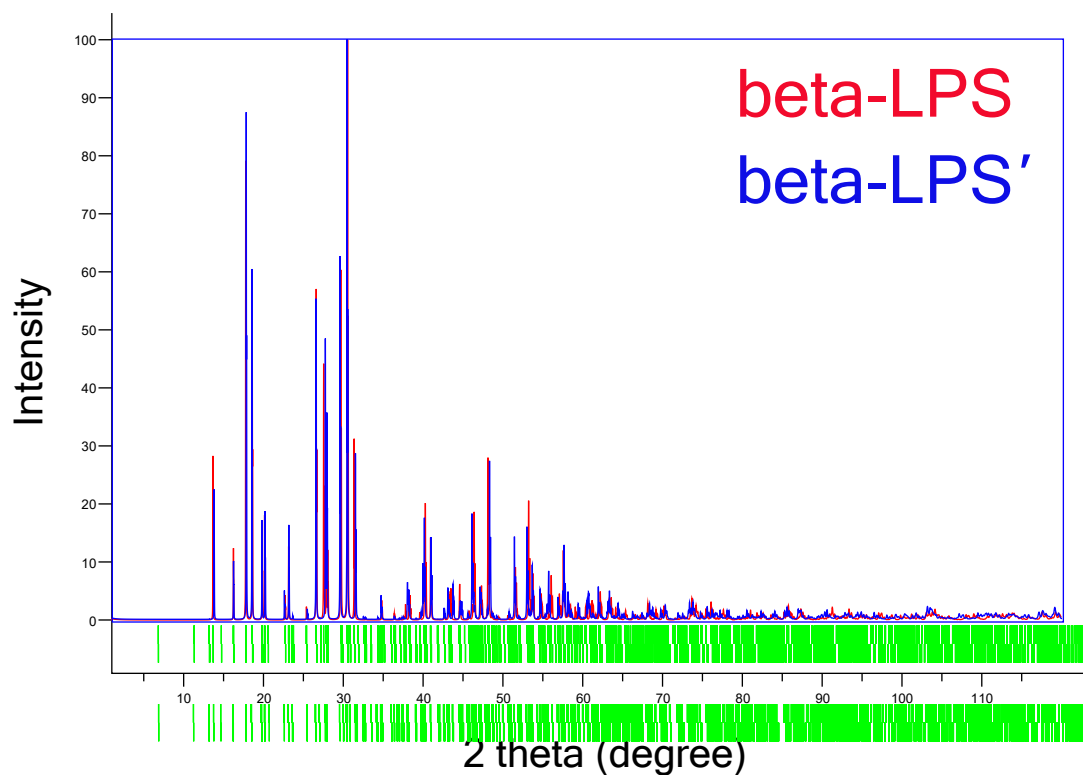

Figure S1: Simulated XRD spectrum generated using the VESTA software for geometry-optimized  $\beta$ -Li<sub>3</sub>PS<sub>4</sub>(cubic) as well as for the distorted  $\beta'$ -Li<sub>3</sub>PS<sub>4</sub> phase (random kick on all atoms followed by a new geometry optimization). Although the differences between both crystals are meaningful – for instance, the cubic crystal is dynamically unstable – the XRD spectra are very similar and experimentally hardly distinguishable.

### 1.3 Structures files for $x\text{-Li}_3\text{PS}_4$

CIF files for  $x\text{-Li}_3\text{PS}_4$  ( $x = \alpha, \beta, \gamma$ ) for the cubic as well as for the distorted crystals.

```
#=====
# CRYSTAL DATA
#=====

_chemical_name_common          gamma-LPS ( )
_cell_length_a                 7.587516
_cell_length_b                 6.495676
_cell_length_c                 6.111789
_cell_angle_alpha              90.000000
_cell_angle_beta               90.000000
_cell_angle_gamma              90.000000
_cell_volume                   301.225914
_space_group_name_H-M_alt      'P 1'
_space_group_IT_number         1

loop_
_space_group_symop_operation_xyz
  'x, y, z'

loop_
_atom_site_label
_atom_site_occupancy
_atom_site_fract_x
_atom_site_fract_y
_atom_site_fract_z
_atom_site_adp_type
_atom_site_U_iso_or_equiv
_atom_site_type_symbol
Li1      1.0    0.257623    0.184812    0.453769    Uiso  ? Li
Li2      1.0    0.242377    0.815188    0.953769    Uiso  ? Li
Li3      1.0    0.757623    0.815188    0.953769    Uiso  ? Li
Li4      1.0    0.742377    0.184812    0.453769    Uiso  ? Li
Li5      1.0    0.000000    0.649338    0.467183    Uiso  ? Li
Li6      1.0    0.500000    0.350662    0.967183    Uiso  ? Li
P1       1.0    0.000000    0.317662    0.955291    Uiso  ? P
P2       1.0    0.500000    0.682338    0.455291    Uiso  ? P
S1       1.0    0.222362    0.168727    0.065176    Uiso  ? S
S2       1.0    0.277638    0.831273    0.565176    Uiso  ? S
S3       1.0    0.722362    0.831273    0.565176    Uiso  ? S
S4       1.0    0.777638    0.168727    0.065176    Uiso  ? S
S5       1.0    0.000000    0.614396    0.070743    Uiso  ? S
S6       1.0    0.500000    0.385604    0.570743    Uiso  ? S
S7       1.0    0.000000    0.311377    0.618864    Uiso  ? S
S8       1.0    0.500000    0.688623    0.118864    Uiso  ? S

#=====
# CRYSTAL DATA
#-----

_chemical_name_common          gamma-LPS (distorted)
_cell_length_a                 7.587406
_cell_length_b                 6.495419
_cell_length_c                 6.111744
_cell_angle_alpha              89.999992
_cell_angle_beta               89.999916
_cell_angle_gamma              89.999657
_cell_volume                   301.207414
_space_group_name_H-M_alt      'P 1'
_space_group_IT_number         1
```

```
loop_
_space_group_symop_operation_xyz
  'x, y, z'
```

```
loop_
_atom_site_label
_atom_site_occupancy
_atom_site_fract_x
_atom_site_fract_y
_atom_site_fract_z
_atom_site_adp_type
_atom_site_U_iso_or_equiv
_atom_site_type_symbol
Li1      1.0      0.257602    0.191058    0.453762    Uiso  ? Li
Li2      1.0      0.242397    0.821442    0.953760    Uiso  ? Li
Li3      1.0      0.757617    0.821447    0.953776    Uiso  ? Li
Li4      1.0      0.742384    0.191053    0.453777    Uiso  ? Li
Li5      1.0      0.999995    0.655621    0.467173    Uiso  ? Li
Li6      1.0      0.500005    0.356879    0.967172    Uiso  ? Li
P1       1.0      0.000004    0.323929    0.955294    Uiso  ? P
P2       1.0      0.499996    0.688571    0.455294    Uiso  ? P
S1       1.0      0.222367    0.174984    0.065174    Uiso  ? S
S2       1.0      0.277634    0.837517    0.565174    Uiso  ? S
S3       1.0      0.722357    0.837511    0.565188    Uiso  ? S
S4       1.0      0.777643    0.174988    0.065188    Uiso  ? S
S5       1.0      0.000008    0.620676    0.070738    Uiso  ? S
S6       1.0      0.499991    0.391824    0.570740    Uiso  ? S
S7       1.0      0.999995    0.317656    0.618865    Uiso  ? S
S8       1.0      0.500005    0.694843    0.118865    Uiso  ? S
```

```
#=====
# CRYSTAL DATA
#-----
```

```
_chemical_name_common      alpha-LPS ()
_cell_length_a              8.602873
_cell_length_b              9.048343
_cell_length_c              7.817316
_cell_angle_alpha           90.724464
_cell_angle_beta            90.674187
_cell_angle_gamma           84.678284
_cell_volume                 605.807803
_space_group_name_H-M_alt    'P 1'
_space_group_IT_number       1
```

```
loop_
_space_group_symop_operation_xyz
  'x, y, z'
```

```
loop_
_atom_site_label
_atom_site_occupancy
_atom_site_fract_x
_atom_site_fract_y
_atom_site_fract_z
_atom_site_adp_type
_atom_site_U_iso_or_equiv
_atom_site_type_symbol
Li1      1.0      0.250457    0.383174    0.958220    Uiso  ? Li
Li2      1.0      0.257779    0.378121    0.523142    Uiso  ? Li
Li3      1.0      0.732927    0.578588    0.032424    Uiso  ? Li
Li4      1.0      0.214574    0.779595    0.531969    Uiso  ? Li
Li5      1.0      0.755149    0.895530    0.953822    Uiso  ? Li
Li6      1.0      0.747179    0.896722    0.513198    Uiso  ? Li
Li7      1.0      0.308933    0.006572    0.008252    Uiso  ? Li
Li8      1.0      0.712363    0.262409    0.528464    Uiso  ? Li
Li9      1.0      0.257402    0.693817    0.040986    Uiso  ? Li
```

|      |     |          |          |          |      |      |
|------|-----|----------|----------|----------|------|------|
| Li10 | 1.0 | 0.718975 | 0.580814 | 0.459979 | Uiso | ? Li |
| Li11 | 1.0 | 0.013726 | 0.147410 | 0.259222 | Uiso | ? Li |
| Li12 | 1.0 | 0.730800 | 0.261739 | 0.957820 | Uiso | ? Li |
| P1   | 1.0 | 0.972152 | 0.822484 | 0.235415 | Uiso | ? P  |
| P2   | 1.0 | 0.014109 | 0.141598 | 0.742613 | Uiso | ? P  |
| P3   | 1.0 | 0.473385 | 0.317860 | 0.236512 | Uiso | ? P  |
| P4   | 1.0 | 0.503177 | 0.645239 | 0.745327 | Uiso | ? P  |
| S1   | 1.0 | 0.291219 | 0.481764 | 0.243532 | Uiso | ? S  |
| S2   | 1.0 | 0.690725 | 0.486174 | 0.744963 | Uiso | ? S  |
| S3   | 1.0 | 0.284609 | 0.568221 | 0.745672 | Uiso | ? S  |
| S4   | 1.0 | 0.694762 | 0.397373 | 0.243534 | Uiso | ? S  |
| S5   | 1.0 | 0.793459 | 0.991225 | 0.235824 | Uiso | ? S  |
| S6   | 1.0 | 0.196083 | 0.985600 | 0.736433 | Uiso | ? S  |
| S7   | 1.0 | 0.791077 | 0.066182 | 0.737016 | Uiso | ? S  |
| S8   | 1.0 | 0.185470 | 0.910625 | 0.255974 | Uiso | ? S  |
| S9   | 1.0 | 0.006185 | 0.283972 | 0.537744 | Uiso | ? S  |
| S10  | 1.0 | 0.965535 | 0.701436 | 0.013209 | Uiso | ? S  |
| S11  | 1.0 | 0.957141 | 0.697783 | 0.451335 | Uiso | ? S  |
| S12  | 1.0 | 0.016589 | 0.267698 | 0.965553 | Uiso | ? S  |
| S13  | 1.0 | 0.510424 | 0.769938 | 0.530378 | Uiso | ? S  |
| S14  | 1.0 | 0.468215 | 0.206601 | 0.004690 | Uiso | ? S  |
| S15  | 1.0 | 0.456817 | 0.185174 | 0.441134 | Uiso | ? S  |
| S16  | 1.0 | 0.518400 | 0.768461 | 0.970243 | Uiso | ? S  |

```
#=====
# CRYSTAL DATA
#-----
```

```
_chemical_name_common      alpha-LPS (distorted)
_cell_length_a             8.481197
_cell_length_b             9.135945
_cell_length_c             7.985745
_cell_angle_alpha         90.000336
_cell_angle_beta          90.000031
_cell_angle_gamma         94.489418
_cell_volume               616.867053
_space_group_name_H-M_alt  'P 1'
_space_group_IT_number     1
```

```
loop_
_space_group_symop_operation_xyz
  'x, y, z'
```

```
loop_
_atom_site_label
_atom_site_occupancy
_atom_site_fract_x
_atom_site_fract_y
_atom_site_fract_z
_atom_site_adp_type
_atom_site_U_iso_or_equiv
_atom_site_type_symbol
Li1      1.0    0.258857    0.269856    0.936405    Uiso    ? Li
Li2      1.0    0.254836    0.565647    0.454254    Uiso    ? Li
Li3      1.0    0.709256    0.702638    0.037633    Uiso    ? Li
Li4      1.0    0.224622    0.883522    0.518119    Uiso    ? Li
Li5      1.0    0.754847    0.065654    0.019787    Uiso    ? Li
Li6      1.0    0.758854    0.769859    0.537635    Uiso    ? Li
Li7      1.0    0.213265    0.906840    0.954250    Uiso    ? Li
Li8      1.0    0.743491    0.088972    0.455918    Uiso    ? Li
Li9      1.0    0.243499    0.588974    0.018122    Uiso    ? Li
Li10     1.0    0.713276    0.406847    0.519784    Uiso    ? Li
Li11     1.0    0.209258    0.202634    0.436402    Uiso    ? Li
Li12     1.0    0.724614    0.383520    0.955916    Uiso    ? Li
P1       1.0    0.002225    0.825986    0.242380    Uiso    ? P
P2       1.0    0.965887    0.146508    0.731657    Uiso    ? P
P3       1.0    0.502226    0.325987    0.231659    Uiso    ? P
```

|     |     |          |          |          |      |     |
|-----|-----|----------|----------|----------|------|-----|
| P4  | 1.0 | 0.465886 | 0.646506 | 0.742379 | Uiso | ? P |
| S1  | 1.0 | 0.277716 | 0.402456 | 0.222578 | Uiso | ? S |
| S2  | 1.0 | 0.690396 | 0.570038 | 0.751460 | Uiso | ? S |
| S3  | 1.0 | 0.280889 | 0.488411 | 0.740706 | Uiso | ? S |
| S4  | 1.0 | 0.687223 | 0.484083 | 0.233332 | Uiso | ? S |
| S5  | 1.0 | 0.777718 | 0.902457 | 0.251459 | Uiso | ? S |
| S6  | 1.0 | 0.190394 | 0.070038 | 0.722579 | Uiso | ? S |
| S7  | 1.0 | 0.780890 | 0.988415 | 0.733335 | Uiso | ? S |
| S8  | 1.0 | 0.187223 | 0.984080 | 0.240702 | Uiso | ? S |
| S9  | 1.0 | 0.952467 | 0.276558 | 0.522226 | Uiso | ? S |
| S10 | 1.0 | 0.005196 | 0.712010 | 0.021463 | Uiso | ? S |
| S11 | 1.0 | 0.015645 | 0.695935 | 0.451813 | Uiso | ? S |
| S12 | 1.0 | 0.962916 | 0.260483 | 0.952573 | Uiso | ? S |
| S13 | 1.0 | 0.462914 | 0.760476 | 0.521451 | Uiso | ? S |
| S14 | 1.0 | 0.515646 | 0.195929 | 0.022234 | Uiso | ? S |
| S15 | 1.0 | 0.505198 | 0.212017 | 0.452586 | Uiso | ? S |
| S16 | 1.0 | 0.452467 | 0.776565 | 0.951803 | Uiso | ? S |

```

#=====
# CRYSTAL DATA
#-----

```

```

_chemical_name_common          beta-LPS ( )
_cell_length_a                 6.013873
_cell_length_b                 7.821161
_cell_length_c                 12.945476
_cell_angle_alpha              90.000000
_cell_angle_beta               90.000000
_cell_angle_gamma              90.000000
_cell_volume                   608.896509
_space_group_name_H-M_alt      'P 1'
_space_group_IT_number         1

```

```

loop_
_space_group_symop_operation_xyz
  'x, y, z'

```

```

loop_
_atom_site_label
_atom_site_occupancy
_atom_site_fract_x
_atom_site_fract_y
_atom_site_fract_z
_atom_site_adp_type
_atom_site_U_iso_or_equiv
_atom_site_type_symbol
Li1      1.0    0.374367    0.032162    0.669877    Uiso    ? Li
Li2      1.0    0.625633    0.967838    0.330123    Uiso    ? Li
Li3      1.0    0.874367    0.967838    0.830123    Uiso    ? Li
Li4      1.0    0.125633    0.032162    0.169877    Uiso    ? Li
Li5      1.0    0.625633    0.532162    0.330123    Uiso    ? Li
Li6      1.0    0.374367    0.467838    0.669877    Uiso    ? Li
Li7      1.0    0.125633    0.467838    0.169877    Uiso    ? Li
Li8      1.0    0.874367    0.532162    0.830123    Uiso    ? Li
Li9      1.0    0.500000    0.000000   -0.000000    Uiso    ? Li
Li10     1.0   -0.000000    0.000000    0.500000    Uiso    ? Li
Li11     1.0    0.500000    0.500000   -0.000000    Uiso    ? Li
Li12     1.0   -0.000000    0.500000    0.500000    Uiso    ? Li
P1       1.0    0.143036    0.250000    0.912323    Uiso    ? P
P2       1.0    0.856964    0.750000    0.087677    Uiso    ? P
P3       1.0    0.643036    0.750000    0.587677    Uiso    ? P
P4       1.0    0.356964    0.250000    0.412323    Uiso    ? P
S1       1.0    0.803802    0.250000    0.902917    Uiso    ? S
S2       1.0    0.196198    0.750000    0.097083    Uiso    ? S
S3       1.0    0.303802    0.750000    0.597083    Uiso    ? S
S4       1.0    0.696198    0.250000    0.402917    Uiso    ? S
S5       1.0    0.276700    0.250000    0.061289    Uiso    ? S

```



|     |     |          |          |          |      |     |
|-----|-----|----------|----------|----------|------|-----|
| S6  | 1.0 | 0.723300 | 0.750000 | 0.938711 | Uiso | ? S |
| S7  | 1.0 | 0.776700 | 0.750000 | 0.438711 | Uiso | ? S |
| S8  | 1.0 | 0.223300 | 0.250000 | 0.561289 | Uiso | ? S |
| S9  | 1.0 | 0.262969 | 0.028569 | 0.847249 | Uiso | ? S |
| S10 | 1.0 | 0.737031 | 0.971431 | 0.152751 | Uiso | ? S |
| S11 | 1.0 | 0.762969 | 0.971431 | 0.652751 | Uiso | ? S |
| S12 | 1.0 | 0.237031 | 0.028569 | 0.347249 | Uiso | ? S |
| S13 | 1.0 | 0.737031 | 0.528569 | 0.152751 | Uiso | ? S |
| S14 | 1.0 | 0.262969 | 0.471431 | 0.847249 | Uiso | ? S |
| S15 | 1.0 | 0.237031 | 0.471431 | 0.347249 | Uiso | ? S |
| S16 | 1.0 | 0.762969 | 0.528569 | 0.652751 | Uiso | ? S |

```
#=====
# CRYSTAL DATA
#-----
```

```
_chemical_name_common          beta-LPS (distorted)
_cell_length_a                 6.045046
_cell_length_b                 7.875972
_cell_length_c                 12.874979
_cell_angle_alpha              89.999916
_cell_angle_beta               89.999985
_cell_angle_gamma              90.000008
_cell_volume                   612.985661
_space_group_name_H-M_alt      'P 1'
_space_group_IT_number         1
```

```
loop_
_space_group_symop_operation_xyz
  'x, y, z'
```

```
loop_
_atom_site_label
_atom_site_occupancy
_atom_site_fract_x
_atom_site_fract_y
_atom_site_fract_z
_atom_site_adp_type
_atom_site_U_iso_or_equiv
_atom_site_type_symbol
Li1      1.0    0.632744    0.970213    0.663149    Uiso  ? Li
Li2      1.0    0.403114    0.039522    0.325691    Uiso  ? Li
Li3      1.0    0.132744    0.029789    0.833102    Uiso  ? Li
Li4      1.0    0.903112    0.960480    0.170559    Uiso  ? Li
Li5      1.0    0.369769    0.470207    0.333103    Uiso  ? Li
Li6      1.0    0.599378    0.539524    0.670557    Uiso  ? Li
Li7      1.0    0.869768    0.529793    0.163148    Uiso  ? Li
Li8      1.0    0.099377    0.460475    0.825693    Uiso  ? Li
Li9      1.0    0.557713    0.042879    0.003796    Uiso  ? Li
Li10     1.0    0.057714    0.957119    0.492456    Uiso  ? Li
Li11     1.0    0.444788    0.542879    0.992456    Uiso  ? Li
Li12     1.0    0.944789    0.457124    0.503795    Uiso  ? Li
P1       1.0    0.849054    0.749419    0.909704    Uiso  ? P
P2       1.0    0.153446    0.249416    0.086547    Uiso  ? P
P3       1.0    0.349053    0.250581    0.586547    Uiso  ? P
P4       1.0    0.653445    0.750585    0.409703    Uiso  ? P
S1       1.0    0.186160    0.743879    0.895754    Uiso  ? S
S2       1.0    0.816338    0.243884    0.100495    Uiso  ? S
S3       1.0    0.686160    0.256121    0.600495    Uiso  ? S
S4       1.0    0.316338    0.756117    0.395753    Uiso  ? S
S5       1.0    0.724097    0.756703    0.060410    Uiso  ? S
S6       1.0    0.278404    0.256702    0.935842    Uiso  ? S
S7       1.0    0.224094    0.243297    0.435841    Uiso  ? S
S8       1.0    0.778401    0.743299    0.560410    Uiso  ? S
S9       1.0    0.740034    0.971065    0.842441    Uiso  ? S
S10      1.0    0.285108    0.031277    0.148278    Uiso  ? S
S11      1.0    0.240034    0.028936    0.653811    Uiso  ? S
```

|     |     |          |          |          |      |     |
|-----|-----|----------|----------|----------|------|-----|
| S12 | 1.0 | 0.785109 | 0.968724 | 0.347973 | Uiso | ? S |
| S13 | 1.0 | 0.262474 | 0.471058 | 0.153812 | Uiso | ? S |
| S14 | 1.0 | 0.717384 | 0.531284 | 0.847971 | Uiso | ? S |
| S15 | 1.0 | 0.762475 | 0.528942 | 0.342440 | Uiso | ? S |
| S16 | 1.0 | 0.217384 | 0.468716 | 0.648280 | Uiso | ? S |

## 1.4 Cubic and distorted geometry-optimized crystal structures of $\text{Li}_6\text{PS}_5\text{X}$

The coordinates for the cubic and distorted coordinates of  $\text{Li}_6\text{PS}_5\text{X}$  are given below

in CIF format.

```
#=====
# CRYSTAL DATA
#-----
# CIF file created by FINDSYM, version 7.1.3

_chemical_name_common 'LPS-Cl (cubic)'

data_findsym-output
_audit_creation_method FINDSYM

_cell_length_a      10.0733160000
_cell_length_b      10.0733160000
_cell_length_c      10.0733160000
_cell_angle_alpha   90.0000000000
_cell_angle_beta    90.0000000000
_cell_angle_gamma   90.0000000000
_cell_volume        1022.1564511665

_symmetry_space_group_name_H-M "F -4 3 m"
_symmetry_Int_Tables_number 216
_space_group.reference_setting '216:F -4 2 3'
_space_group.transform_Pp_abc a,b,c;0,0,0

loop_
_space_group_symop_id
_space_group_symop_operation_xyz
1 x,y,z
2 x,-y,-z
3 -x,y,-z
4 -x,-y,z
5 y,z,x
6 y,-z,-x
7 -y,z,-x
8 -y,-z,x
9 z,x,y
10 z,-x,-y
11 -z,x,-y
12 -z,-x,y
13 y,x,z
14 y,-x,-z
15 -y,x,-z
16 -y,-x,z
17 x,z,y
18 x,-z,-y
19 -x,z,-y
20 -x,-z,y
21 z,y,x
22 z,-y,-x
23 -z,y,-x
24 -z,-y,x
```

25  $x, y+1/2, z+1/2$   
 26  $x, -y+1/2, -z+1/2$   
 27  $-x, y+1/2, -z+1/2$   
 28  $-x, -y+1/2, z+1/2$   
 29  $y, z+1/2, x+1/2$   
 30  $y, -z+1/2, -x+1/2$   
 31  $-y, z+1/2, -x+1/2$   
 32  $-y, -z+1/2, x+1/2$   
 33  $z, x+1/2, y+1/2$   
 34  $z, -x+1/2, -y+1/2$   
 35  $-z, x+1/2, -y+1/2$   
 36  $-z, -x+1/2, y+1/2$   
 37  $y, x+1/2, z+1/2$   
 38  $y, -x+1/2, -z+1/2$   
 39  $-y, x+1/2, -z+1/2$   
 40  $-y, -x+1/2, z+1/2$   
 41  $x, z+1/2, y+1/2$   
 42  $x, -z+1/2, -y+1/2$   
 43  $-x, z+1/2, -y+1/2$   
 44  $-x, -z+1/2, y+1/2$   
 45  $z, y+1/2, x+1/2$   
 46  $z, -y+1/2, -x+1/2$   
 47  $-z, y+1/2, -x+1/2$   
 48  $-z, -y+1/2, x+1/2$   
 49  $x+1/2, y, z+1/2$   
 50  $x+1/2, -y, -z+1/2$   
 51  $-x+1/2, y, -z+1/2$   
 52  $-x+1/2, -y, z+1/2$   
 53  $y+1/2, z, x+1/2$   
 54  $y+1/2, -z, -x+1/2$   
 55  $-y+1/2, z, -x+1/2$   
 56  $-y+1/2, -z, x+1/2$   
 57  $z+1/2, x, y+1/2$   
 58  $z+1/2, -x, -y+1/2$   
 59  $-z+1/2, x, -y+1/2$   
 60  $-z+1/2, -x, y+1/2$   
 61  $y+1/2, x, z+1/2$   
 62  $y+1/2, -x, -z+1/2$   
 63  $-y+1/2, x, -z+1/2$   
 64  $-y+1/2, -x, z+1/2$   
 65  $x+1/2, z, y+1/2$   
 66  $x+1/2, -z, -y+1/2$   
 67  $-x+1/2, z, -y+1/2$   
 68  $-x+1/2, -z, y+1/2$   
 69  $z+1/2, y, x+1/2$   
 70  $z+1/2, -y, -x+1/2$   
 71  $-z+1/2, y, -x+1/2$   
 72  $-z+1/2, -y, x+1/2$   
 73  $x+1/2, y+1/2, z$   
 74  $x+1/2, -y+1/2, -z$   
 75  $-x+1/2, y+1/2, -z$   
 76  $-x+1/2, -y+1/2, z$   
 77  $y+1/2, z+1/2, x$   
 78  $y+1/2, -z+1/2, -x$   
 79  $-y+1/2, z+1/2, -x$   
 80  $-y+1/2, -z+1/2, x$   
 81  $z+1/2, x+1/2, y$   
 82  $z+1/2, -x+1/2, -y$   
 83  $-z+1/2, x+1/2, -y$   
 84  $-z+1/2, -x+1/2, y$   
 85  $y+1/2, x+1/2, z$   
 86  $y+1/2, -x+1/2, -z$   
 87  $-y+1/2, x+1/2, -z$   
 88  $-y+1/2, -x+1/2, z$   
 89  $x+1/2, z+1/2, y$   
 90  $x+1/2, -z+1/2, -y$   
 91  $-x+1/2, z+1/2, -y$

```

92 -x+1/2,-z+1/2,y
93 z+1/2,y+1/2,x
94 z+1/2,-y+1/2,-x
95 -z+1/2,y+1/2,-x
96 -z+1/2,-y+1/2,x

```

```

loop_
_atom_type_symbol
Li
Cl
P
S

```

```

loop_
_atom_site_label
_atom_site_type_symbol
_atom_site_symmetry_multiplicity
_atom_site_Wyckoff_symbol
_atom_site_fract_x
_atom_site_fract_y
_atom_site_fract_z
_atom_site_occupancy
_atom_site_fract_symmform
Li1 Li 24 g 0.5232520000 0.2500000000 0.2500000000 1.0000000000 Dx,0,0
Cl1 Cl 4 a 0.0000000000 0.0000000000 0.0000000000 1.0000000000 0,0,0
P1 P 4 b 0.5000000000 0.5000000000 0.5000000000 1.0000000000 0,0,0
S1 S 16 e 0.3823810000 0.3823810000 0.3823810000 1.0000000000 Dx,Dx,Dx
S2 S 4 d 0.7500000000 0.7500000000 0.7500000000 1.0000000000 0,0,0

```

```
# end of cif
```

```

#=====
# CRYSTAL DATA
#-----
#
# Same structure as the one with space group 7, but here in P1 setting, without symmetry

```

```

_chemical_name_common 'LPS-Cl (distorted, space group ITA=1)'
_cell_length_a 9.832060
_cell_length_b 9.609316
_cell_length_c 9.609315
_cell_angle_alpha 89.163658
_cell_angle_beta 88.865364
_cell_angle_gamma 88.865364
_cell_volume 907.434388
_space_group_name_H-M_alt 'P 1'
_space_group_IT_number 1

```

```

loop_
_space_group_symop_operation_xyz
'x, y, z'

```

```

loop_
_atom_site_label
_atom_site_occupancy
_atom_site_fract_x
_atom_site_fract_y
_atom_site_fract_z
_atom_site_adp_type
_atom_site_U_iso_or_equiv
_atom_site_type_symbol
Li1 1.0 0.447003 0.718410 0.340692 Uiso ? Li
Li2 1.0 0.477583 0.168468 0.202390 Uiso ? Li
Li3 1.0 0.329044 0.868021 0.076003 Uiso ? Li
Li4 1.0 0.829044 0.250226 0.193798 Uiso ? Li
Li5 1.0 0.367842 0.000853 0.522347 Uiso ? Li
Li6 1.0 0.633430 0.916680 0.340212 Uiso ? Li

```

|      |     |          |          |          |      |      |
|------|-----|----------|----------|----------|------|------|
| Li7  | 1.0 | 0.447004 | 0.218409 | 0.840690 | Uiso | ? Li |
| Li8  | 1.0 | 0.633430 | 0.416679 | 0.840211 | Uiso | ? Li |
| Li9  | 1.0 | 0.183857 | 0.049849 | 0.316818 | Uiso | ? Li |
| Li10 | 1.0 | 0.183858 | 0.549850 | 0.816817 | Uiso | ? Li |
| Li11 | 1.0 | 0.329045 | 0.368022 | 0.576002 | Uiso | ? Li |
| Li12 | 1.0 | 0.367842 | 0.500851 | 0.022346 | Uiso | ? Li |
| Li13 | 1.0 | 0.947005 | 0.014916 | 0.544186 | Uiso | ? Li |
| Li14 | 1.0 | 0.133431 | 0.014432 | 0.742457 | Uiso | ? Li |
| Li15 | 1.0 | 0.683856 | 0.991044 | 0.875621 | Uiso | ? Li |
| Li16 | 1.0 | 0.829044 | 0.750227 | 0.693798 | Uiso | ? Li |
| Li17 | 1.0 | 0.867845 | 0.196570 | 0.826630 | Uiso | ? Li |
| Li18 | 1.0 | 0.977581 | 0.876613 | 0.994245 | Uiso | ? Li |
| Li19 | 1.0 | 0.133430 | 0.514434 | 0.242455 | Uiso | ? Li |
| Li20 | 1.0 | 0.947004 | 0.514915 | 0.044184 | Uiso | ? Li |
| Li21 | 1.0 | 0.867844 | 0.696571 | 0.326630 | Uiso | ? Li |
| Li22 | 1.0 | 0.477584 | 0.668468 | 0.702390 | Uiso | ? Li |
| Li23 | 1.0 | 0.977581 | 0.376614 | 0.494244 | Uiso | ? Li |
| Li24 | 1.0 | 0.683855 | 0.491044 | 0.375617 | Uiso | ? Li |
| Cl1  | 1.0 | 0.155752 | 0.676948 | 0.037724 | Uiso | ? Cl |
| Cl2  | 1.0 | 0.155753 | 0.176948 | 0.537725 | Uiso | ? Cl |
| Cl3  | 1.0 | 0.655752 | 0.711947 | 0.502724 | Uiso | ? Cl |
| Cl4  | 1.0 | 0.655752 | 0.211948 | 0.002725 | Uiso | ? Cl |
| P1   | 1.0 | 0.651289 | 0.704279 | 0.031760 | Uiso | ? P  |
| P2   | 1.0 | 0.651290 | 0.204278 | 0.531761 | Uiso | ? P  |
| P3   | 1.0 | 0.151289 | 0.705984 | 0.530053 | Uiso | ? P  |
| P4   | 1.0 | 0.151289 | 0.205984 | 0.030054 | Uiso | ? P  |
| S1   | 1.0 | 0.278009 | 0.069201 | 0.924429 | Uiso | ? S  |
| S2   | 1.0 | 0.015208 | 0.086090 | 0.139912 | Uiso | ? S  |
| S3   | 1.0 | 0.515209 | 0.814138 | 0.911866 | Uiso | ? S  |
| S4   | 1.0 | 0.768650 | 0.839592 | 0.139667 | Uiso | ? S  |
| S5   | 1.0 | 0.405140 | 0.951185 | 0.288657 | Uiso | ? S  |
| S6   | 1.0 | 0.278008 | 0.569201 | 0.424428 | Uiso | ? S  |
| S7   | 1.0 | 0.015208 | 0.586090 | 0.639912 | Uiso | ? S  |
| S8   | 1.0 | 0.515210 | 0.314137 | 0.411866 | Uiso | ? S  |
| S9   | 1.0 | 0.768651 | 0.339591 | 0.639667 | Uiso | ? S  |
| S10  | 1.0 | 0.405140 | 0.451184 | 0.788656 | Uiso | ? S  |
| S11  | 1.0 | 0.778009 | 0.098653 | 0.394978 | Uiso | ? S  |
| S12  | 1.0 | 0.550568 | 0.070125 | 0.663761 | Uiso | ? S  |
| S13  | 1.0 | 0.050569 | 0.837986 | 0.395901 | Uiso | ? S  |
| S14  | 1.0 | 0.268651 | 0.813888 | 0.665369 | Uiso | ? S  |
| S15  | 1.0 | 0.905140 | 0.962880 | 0.776961 | Uiso | ? S  |
| S16  | 1.0 | 0.778008 | 0.598653 | 0.894978 | Uiso | ? S  |
| S17  | 1.0 | 0.550566 | 0.570127 | 0.163761 | Uiso | ? S  |
| S18  | 1.0 | 0.050570 | 0.337986 | 0.895901 | Uiso | ? S  |
| S19  | 1.0 | 0.268650 | 0.313889 | 0.165370 | Uiso | ? S  |
| S20  | 1.0 | 0.905139 | 0.462881 | 0.276959 | Uiso | ? S  |

#=====

# CRYSTAL DATA

#-----

# CIF file created by FINDSYM, version 7.1.3

#

# same structure as the one in P1 setting, but now with symmetry operations detected

\_chemical\_name\_common 'LPS-Cl (distorted, space group ITA=7)'

data\_findsym-output

\_audit\_creation\_method FINDSYM

|                   |                |
|-------------------|----------------|
| _cell_length_a    | 6.8442224118   |
| _cell_length_b    | 6.7450399522   |
| _cell_length_c    | 11.8224808616  |
| _cell_angle_alpha | 90.0000000000  |
| _cell_angle_beta  | 123.7654729061 |
| _cell_angle_gamma | 90.0000000000  |
| _cell_volume      | 453.7172103539 |

```

_symmetry_space_group_name_H-M "P 1 c 1"
_symmetry_Int_Tables_number 7
_space_group.reference_setting '007:P -2yc'
_space_group.transform_Pp_abc a,b,c;0,0,0

loop_
_space_group_symop_id
_space_group_symop_operation_xyz
1 x,y,z
2 x,-y,z+1/2

loop_
_atom_type_symbol
Li
Cl
P
S

loop_
_atom_site_label
_atom_site_type_symbol
_atom_site_symmetry_multiplicity
_atom_site_Wyckoff_symbol
_atom_site_fract_x
_atom_site_fract_y
_atom_site_fract_z
_atom_site_occupancy
_atom_site_fract_symmform
Li1 Li 2 a 0.4938955000 0.5465060000 0.5529960000 1.0000000000 Dx,Dy,Dz
Li2 Li 2 a 0.1515597500 -0.0418545000 0.5224177500 1.0000000000 Dx,Dy,Dz
Li3 Li 2 a 0.7269315000 0.1322047500 0.6709557500 1.0000000000 Dx,Dy,Dz
Li4 Li 2 a 0.1089572500 0.4457175000 0.6321567500 1.0000000000 Dx,Dy,Dz
Li5 Li 2 a 0.1096797500 0.3477545000 0.3665697500 1.0000000000 Dx,Dy,Dz
Li6 Li 2 a 0.4494785000 0.1911965000 0.8161435000 1.0000000000 Dx,Dy,Dz
Cl1 Cl 2 a 0.1295755000 0.2849997500 0.8442477500 1.0000000000 Dx,Dy,Dz
P1 P 2 a 0.6126725000 0.2517062500 0.3487107500 1.0000000000 Dx,Dy,Dz
S1 S 2 a 0.7283612500 0.7794512500 0.7219915000 1.0000000000 Dx,Dy,Dz
S2 S 2 a 0.7587885000 -0.0219532500 -0.0152087500 1.0000000000 Dx,Dy,Dz
S3 S 2 a 0.2520912500 0.2242972500 0.2313495000 1.0000000000 Dx,Dy,Dz
S4 S 2 a 0.3550195000 0.2616962500 0.5948602500 1.0000000000 Dx,Dy,Dz
S5 S 2 a 0.7155447500 0.5178600000 0.4494317500 1.0000000000 Dx,Dy,Dz

# end of cif

#=====
# CRYSTAL DATA
#-----
# CIF file created by FINDSYM, version 7.1.3

_chemical_name_common 'LPS-Br (cubic)'

data_findsym-output
_audit_creation_method FINDSYM

_cell_length_a 10.0833620000
_cell_length_b 10.0833620000
_cell_length_c 10.0833620000
_cell_angle_alpha 90.0000000000
_cell_angle_beta 90.0000000000
_cell_angle_gamma 90.0000000000
_cell_volume 1025.2176559925

_symmetry_space_group_name_H-M "F -4 3 m"
_symmetry_Int_Tables_number 216
_space_group.reference_setting '216:F -4 2 3'

```

\_space\_group.transform\_Pp\_abc a,b,c;0,0,0

```
loop_
_space_group_symop_id
_space_group_symop_operation_xyz
1 x,y,z
2 x,-y,-z
3 -x,y,-z
4 -x,-y,z
5 y,z,x
6 y,-z,-x
7 -y,z,-x
8 -y,-z,x
9 z,x,y
10 z,-x,-y
11 -z,x,-y
12 -z,-x,y
13 y,x,z
14 y,-x,-z
15 -y,x,-z
16 -y,-x,z
17 x,z,y
18 x,-z,-y
19 -x,z,-y
20 -x,-z,y
21 z,y,x
22 z,-y,-x
23 -z,y,-x
24 -z,-y,x
25 x,y+1/2,z+1/2
26 x,-y+1/2,-z+1/2
27 -x,y+1/2,-z+1/2
28 -x,-y+1/2,z+1/2
29 y,z+1/2,x+1/2
30 y,-z+1/2,-x+1/2
31 -y,z+1/2,-x+1/2
32 -y,-z+1/2,x+1/2
33 z,x+1/2,y+1/2
34 z,-x+1/2,-y+1/2
35 -z,x+1/2,-y+1/2
36 -z,-x+1/2,y+1/2
37 y,x+1/2,z+1/2
38 y,-x+1/2,-z+1/2
39 -y,x+1/2,-z+1/2
40 -y,-x+1/2,z+1/2
41 x,z+1/2,y+1/2
42 x,-z+1/2,-y+1/2
43 -x,z+1/2,-y+1/2
44 -x,-z+1/2,y+1/2
45 z,y+1/2,x+1/2
46 z,-y+1/2,-x+1/2
47 -z,y+1/2,-x+1/2
48 -z,-y+1/2,x+1/2
49 x+1/2,y,z+1/2
50 x+1/2,-y,-z+1/2
51 -x+1/2,y,-z+1/2
52 -x+1/2,-y,z+1/2
53 y+1/2,z,x+1/2
54 y+1/2,-z,-x+1/2
55 -y+1/2,z,-x+1/2
56 -y+1/2,-z,x+1/2
57 z+1/2,x,y+1/2
58 z+1/2,-x,-y+1/2
59 -z+1/2,x,-y+1/2
60 -z+1/2,-x,y+1/2
61 y+1/2,x,z+1/2
62 y+1/2,-x,-z+1/2
```

```

63 -y+1/2,x,-z+1/2
64 -y+1/2,-x,z+1/2
65 x+1/2,z,y+1/2
66 x+1/2,-z,-y+1/2
67 -x+1/2,z,-y+1/2
68 -x+1/2,-z,y+1/2
69 z+1/2,y,x+1/2
70 z+1/2,-y,-x+1/2
71 -z+1/2,y,-x+1/2
72 -z+1/2,-y,x+1/2
73 x+1/2,y+1/2,z
74 x+1/2,-y+1/2,-z
75 -x+1/2,y+1/2,-z
76 -x+1/2,-y+1/2,z
77 y+1/2,z+1/2,x
78 y+1/2,-z+1/2,-x
79 -y+1/2,z+1/2,-x
80 -y+1/2,-z+1/2,x
81 z+1/2,x+1/2,y
82 z+1/2,-x+1/2,-y
83 -z+1/2,x+1/2,-y
84 -z+1/2,-x+1/2,y
85 y+1/2,x+1/2,z
86 y+1/2,-x+1/2,-z
87 -y+1/2,x+1/2,-z
88 -y+1/2,-x+1/2,z
89 x+1/2,z+1/2,y
90 x+1/2,-z+1/2,-y
91 -x+1/2,z+1/2,-y
92 -x+1/2,-z+1/2,y
93 z+1/2,y+1/2,x
94 z+1/2,-y+1/2,-x
95 -z+1/2,y+1/2,-x
96 -z+1/2,-y+1/2,x

```

```

loop_
_atom_type_symbol
Li
P
S
Br

```

```

loop_
_atom_site_label
_atom_site_type_symbol
_atom_site_symmetry_multiplicity
_atom_site_Wyckoff_symbol
_atom_site_fract_x
_atom_site_fract_y
_atom_site_fract_z
_atom_site_occupancy
_atom_site_fract_symmform
Li1 Li 24 g 0.0234010000 0.2500000000 0.2500000000 1.0000000000 Dx,0,0
P1 P 4 b 0.5000000000 0.5000000000 0.5000000000 1.0000000000 0,0,0
S1 S 16 e 0.6175070000 0.6175070000 0.6175070000 1.0000000000 Dx,Dx,Dx
S2 S 4 c 0.2500000000 0.2500000000 0.2500000000 1.0000000000 0,0,0
Br1 Br 4 a 0.0000000000 0.0000000000 0.0000000000 1.0000000000 0,0,0

```

```
# end of cif
```

```

#=====
# CRYSTAL DATA
#-----
# CIF file created by FINDSYM, version 7.1.3

```

```
_chemical_name_common 'LPS-Br (distorted)'
```



```

data_findsym-output
_audit_creation_method FINDSYM

_cell_length_a      9.7279730000
_cell_length_b      9.8182750000
_cell_length_c      9.8849750000
_cell_angle_alpha   91.1095810000
_cell_angle_beta    90.8476870000
_cell_angle_gamma   90.0409010000
_cell_volume        943.8520649877

_symmetry_space_group_name_H-M "P 1"
_symmetry_Int_Tables_number 1
_space_group.reference_setting '001:P 1'
_space_group.transform_Pp_abc a,b,c;0,0,0

```

```

loop_
_space_group_symop_id
_space_group_symop_operation_xyz
1 x,y,z

```

```

loop_
_atom_type_symbol
Li
P
S
Br

```

```

loop_
_atom_site_label
_atom_site_type_symbol
_atom_site_symmetry_multiplicity
_atom_site_Wyckoff_symbol
_atom_site_fract_x
_atom_site_fract_y
_atom_site_fract_z
_atom_site_occupancy
_atom_site_fract_symmform
Li1  Li   1 a  0.3216400000  0.3216400000  0.3189990000  1.0000000000  Dx,Dy,Dz
Li2  Li   1 a  0.4817160000  0.2083470000  0.2748180000  1.0000000000  Dx,Dy,Dz
Li3  Li   1 a  0.2882960000  0.1964580000  0.4762520000  1.0000000000  Dx,Dy,Dz
Li4  Li   1 a  0.1815940000  0.2166220000  0.0207000000  1.0000000000  Dx,Dy,Dz
Li5  Li   1 a  0.1884950000  0.0184450000  0.2128220000  1.0000000000  Dx,Dy,Dz
Li6  Li   1 a  0.3175010000  0.4602780000  0.1882270000  1.0000000000  Dx,Dy,Dz
Li7  Li   1 a  0.5172200000  0.2115000000  0.7111390000  1.0000000000  Dx,Dy,Dz
Li8  Li   1 a -0.0336200000  0.3353240000  0.6898960000  1.0000000000  Dx,Dy,Dz
Li9  Li   1 a  0.7019450000  0.2866660000 -0.0181610000  1.0000000000  Dx,Dy,Dz
Li10 Li   1 a  0.7222980000  0.2067940000  0.5252800000  1.0000000000  Dx,Dy,Dz
Li11 Li   1 a  0.8125980000  0.0431400000  0.8074700000  1.0000000000  Dx,Dy,Dz
Li12 Li   1 a  0.6910670000  0.4924320000  0.7969230000  1.0000000000  Dx,Dy,Dz
Li13 Li   1 a  0.5292780000  0.7092090000  0.1864180000  1.0000000000  Dx,Dy,Dz
Li14 Li   1 a -0.0109880000  0.7117760000  0.2887490000  1.0000000000  Dx,Dy,Dz
Li15 Li   1 a  0.7850340000  0.6958780000  0.4790490000  1.0000000000  Dx,Dy,Dz
Li16 Li   1 a  0.8099780000  0.8233260000  0.0377100000  1.0000000000  Dx,Dy,Dz
Li17 Li   1 a  0.7280550000  0.5148650000  0.2035010000  1.0000000000  Dx,Dy,Dz
Li18 Li   1 a  0.6950140000 -0.0374920000  0.3181380000  1.0000000000  Dx,Dy,Dz
Li19 Li   1 a  0.0174320000  0.7121980000  0.7164710000  1.0000000000  Dx,Dy,Dz
Li20 Li   1 a  0.4688580000  0.8325530000  0.6789570000  1.0000000000  Dx,Dy,Dz
Li21 Li   1 a  0.2041940000  0.7889660000 -0.0249030000  1.0000000000  Dx,Dy,Dz
Li22 Li   1 a  0.2164880000  0.6823490000  0.5249300000  1.0000000000  Dx,Dy,Dz
Li23 Li   1 a  0.3308050000  0.5416580000  0.8106860000  1.0000000000  Dx,Dy,Dz
Li24 Li   1 a  0.2005990000 -0.0140290000  0.7836630000  1.0000000000  Dx,Dy,Dz
P1   P    1 a  0.0080390000  0.5030060000 -0.0020340000  1.0000000000  Dx,Dy,Dz
P2   P    1 a  0.5009030000  0.5031200000  0.4946010000  1.0000000000  Dx,Dy,Dz
P3   P    1 a  0.5024640000  0.0011170000 -0.0008860000  1.0000000000  Dx,Dy,Dz
P4   P    1 a -0.0004980000  0.0039850000  0.5016090000  1.0000000000  Dx,Dy,Dz
S1   S    1 a  0.8870110000  0.1177080000  0.3675100000  1.0000000000  Dx,Dy,Dz

```

|     |    |   |   |               |               |               |              |          |
|-----|----|---|---|---------------|---------------|---------------|--------------|----------|
| S2  | S  | 1 | a | 0.1342240000  | 0.8805800000  | 0.3981880000  | 1.0000000000 | Dx,Dy,Dz |
| S3  | S  | 1 | a | 0.8990490000  | 0.3681980000  | 0.1121250000  | 1.0000000000 | Dx,Dy,Dz |
| S4  | S  | 1 | a | 0.1352790000  | 0.6162970000  | 0.1241080000  | 1.0000000000 | Dx,Dy,Dz |
| S5  | S  | 1 | a | 0.2485680000  | 0.2451240000  | 0.2490940000  | 1.0000000000 | Dx,Dy,Dz |
| S6  | S  | 1 | a | 0.3794670000  | 0.1295530000  | 0.8886720000  | 1.0000000000 | Dx,Dy,Dz |
| S7  | S  | 1 | a | 0.6226380000  | 0.8838190000  | 0.8740670000  | 1.0000000000 | Dx,Dy,Dz |
| S8  | S  | 1 | a | 0.3728430000  | 0.3899800000  | 0.6122940000  | 1.0000000000 | Dx,Dy,Dz |
| S9  | S  | 1 | a | 0.6086780000  | 0.6327330000  | 0.6235150000  | 1.0000000000 | Dx,Dy,Dz |
| S10 | S  | 1 | a | 0.7470460000  | 0.2647440000  | 0.7530200000  | 1.0000000000 | Dx,Dy,Dz |
| S11 | S  | 1 | a | 0.3868260000  | 0.6207140000  | 0.3657440000  | 1.0000000000 | Dx,Dy,Dz |
| S12 | S  | 1 | a | 0.6300440000  | 0.3815300000  | 0.3820810000  | 1.0000000000 | Dx,Dy,Dz |
| S13 | S  | 1 | a | 0.3807600000  | 0.8855990000  | 0.1206110000  | 1.0000000000 | Dx,Dy,Dz |
| S14 | S  | 1 | a | 0.6390970000  | 0.1070680000  | 0.1232240000  | 1.0000000000 | Dx,Dy,Dz |
| S15 | S  | 1 | a | 0.7569860000  | 0.7444100000  | 0.2514030000  | 1.0000000000 | Dx,Dy,Dz |
| S16 | S  | 1 | a | 0.8774320000  | 0.6284250000  | 0.8926900000  | 1.0000000000 | Dx,Dy,Dz |
| S17 | S  | 1 | a | 0.1310060000  | 0.3961620000  | 0.8668620000  | 1.0000000000 | Dx,Dy,Dz |
| S18 | S  | 1 | a | 0.8704940000  | 0.8897570000  | 0.6174590000  | 1.0000000000 | Dx,Dy,Dz |
| S19 | S  | 1 | a | 0.1081120000  | 0.1385290000  | 0.6246290000  | 1.0000000000 | Dx,Dy,Dz |
| S20 | S  | 1 | a | 0.2511190000  | 0.7573220000  | 0.7479270000  | 1.0000000000 | Dx,Dy,Dz |
| Br1 | Br | 1 | a | 0.0222700000  | -0.0070960000 | -0.0092750000 | 1.0000000000 | Dx,Dy,Dz |
| Br2 | Br | 1 | a | 0.5072360000  | 0.0358800000  | 0.5003390000  | 1.0000000000 | Dx,Dy,Dz |
| Br3 | Br | 1 | a | 0.5199970000  | 0.4954120000  | 0.0116550000  | 1.0000000000 | Dx,Dy,Dz |
| Br4 | Br | 1 | a | -0.0039390000 | 0.5274190000  | 0.5010350000  | 1.0000000000 | Dx,Dy,Dz |

# end of cif

#=====

# CRYSTAL DATA

#-----

# CIF file created by FINDSYM, version 7.1.3

\_chemical\_name\_common 'LPS-I (cubic)'

data\_findsym-output

\_audit\_creation\_method FINDSYM

\_cell\_length\_a 10.1157050000  
 \_cell\_length\_b 10.1157050000  
 \_cell\_length\_c 10.1157050000  
 \_cell\_angle\_alpha 90.0000000000  
 \_cell\_angle\_beta 90.0000000000  
 \_cell\_angle\_gamma 90.0000000000  
 \_cell\_volume 1035.1146784284

\_symmetry\_space\_group\_name\_H-M "F -4 3 m"  
 \_symmetry\_Int\_Tables\_number 216  
 \_space\_group.reference\_setting '216:F -4 2 3'  
 \_space\_group.transform\_Pp\_abc a,b,c;0,0,0

loop\_

\_space\_group\_symop\_id  
 \_space\_group\_symop\_operation\_xyz  
 1 x,y,z  
 2 x,-y,-z  
 3 -x,y,-z  
 4 -x,-y,z  
 5 y,z,x  
 6 y,-z,-x  
 7 -y,z,-x  
 8 -y,-z,x  
 9 z,x,y  
 10 z,-x,-y  
 11 -z,x,-y  
 12 -z,-x,y  
 13 y,x,z  
 14 y,-x,-z  
 15 -y,x,-z

16  $-y, -x, z$   
 17  $x, z, y$   
 18  $x, -z, -y$   
 19  $-x, z, -y$   
 20  $-x, -z, y$   
 21  $z, y, x$   
 22  $z, -y, -x$   
 23  $-z, y, -x$   
 24  $-z, -y, x$   
 25  $x, y+1/2, z+1/2$   
 26  $x, -y+1/2, -z+1/2$   
 27  $-x, y+1/2, -z+1/2$   
 28  $-x, -y+1/2, z+1/2$   
 29  $y, z+1/2, x+1/2$   
 30  $y, -z+1/2, -x+1/2$   
 31  $-y, z+1/2, -x+1/2$   
 32  $-y, -z+1/2, x+1/2$   
 33  $z, x+1/2, y+1/2$   
 34  $z, -x+1/2, -y+1/2$   
 35  $-z, x+1/2, -y+1/2$   
 36  $-z, -x+1/2, y+1/2$   
 37  $y, x+1/2, z+1/2$   
 38  $y, -x+1/2, -z+1/2$   
 39  $-y, x+1/2, -z+1/2$   
 40  $-y, -x+1/2, z+1/2$   
 41  $x, z+1/2, y+1/2$   
 42  $x, -z+1/2, -y+1/2$   
 43  $-x, z+1/2, -y+1/2$   
 44  $-x, -z+1/2, y+1/2$   
 45  $z, y+1/2, x+1/2$   
 46  $z, -y+1/2, -x+1/2$   
 47  $-z, y+1/2, -x+1/2$   
 48  $-z, -y+1/2, x+1/2$   
 49  $x+1/2, y, z+1/2$   
 50  $x+1/2, -y, -z+1/2$   
 51  $-x+1/2, y, -z+1/2$   
 52  $-x+1/2, -y, z+1/2$   
 53  $y+1/2, z, x+1/2$   
 54  $y+1/2, -z, -x+1/2$   
 55  $-y+1/2, z, -x+1/2$   
 56  $-y+1/2, -z, x+1/2$   
 57  $z+1/2, x, y+1/2$   
 58  $z+1/2, -x, -y+1/2$   
 59  $-z+1/2, x, -y+1/2$   
 60  $-z+1/2, -x, y+1/2$   
 61  $y+1/2, x, z+1/2$   
 62  $y+1/2, -x, -z+1/2$   
 63  $-y+1/2, x, -z+1/2$   
 64  $-y+1/2, -x, z+1/2$   
 65  $x+1/2, z, y+1/2$   
 66  $x+1/2, -z, -y+1/2$   
 67  $-x+1/2, z, -y+1/2$   
 68  $-x+1/2, -z, y+1/2$   
 69  $z+1/2, y, x+1/2$   
 70  $z+1/2, -y, -x+1/2$   
 71  $-z+1/2, y, -x+1/2$   
 72  $-z+1/2, -y, x+1/2$   
 73  $x+1/2, y+1/2, z$   
 74  $x+1/2, -y+1/2, -z$   
 75  $-x+1/2, y+1/2, -z$   
 76  $-x+1/2, -y+1/2, z$   
 77  $y+1/2, z+1/2, x$   
 78  $y+1/2, -z+1/2, -x$   
 79  $-y+1/2, z+1/2, -x$   
 80  $-y+1/2, -z+1/2, x$   
 81  $z+1/2, x+1/2, y$   
 82  $z+1/2, -x+1/2, -y$

```

83 -z+1/2,x+1/2,-y
84 -z+1/2,-x+1/2,y
85 y+1/2,x+1/2,z
86 y+1/2,-x+1/2,-z
87 -y+1/2,x+1/2,-z
88 -y+1/2,-x+1/2,z
89 x+1/2,z+1/2,y
90 x+1/2,-z+1/2,-y
91 -x+1/2,z+1/2,-y
92 -x+1/2,-z+1/2,y
93 z+1/2,y+1/2,x
94 z+1/2,-y+1/2,-x
95 -z+1/2,y+1/2,-x
96 -z+1/2,-y+1/2,x

```

```

loop_
_atom_type_symbol
Li
P
S
I

```

```

loop_
_atom_site_label
_atom_site_type_symbol
_atom_site_symmetry_multiplicity
_atom_site_Wyckoff_symbol
_atom_site_fract_x
_atom_site_fract_y
_atom_site_fract_z
_atom_site_occupancy
_atom_site_fract_symmform
Li1 Li 24 g 0.0236290000 0.2500000000 0.2500000000 1.0000000000 Dx,0,0
P1 P 4 b 0.5000000000 0.5000000000 0.5000000000 1.0000000000 0,0,0
S1 S 16 e 0.6171800000 0.6171800000 0.6171800000 1.0000000000 Dx,Dx,Dx
S2 S 4 c 0.2500000000 0.2500000000 0.2500000000 1.0000000000 0,0,0
I1 I 4 a 0.0000000000 0.0000000000 0.0000000000 1.0000000000 0,0,0

```

```
# end of cif
```

```

#=====
# CRYSTAL DATA
#-----
# CIF file created by FINDSYM, version 7.1.3

```

```
_chemical_name_common 'LPS-I (distorted)'
```

```
data_findsym-output
_audit_creation_method FINDSYM
```

```

_cell_length_a 9.9239540000
_cell_length_b 9.9537700000
_cell_length_c 10.0020930000
_cell_angle_alpha 89.0666960000
_cell_angle_beta 89.7256160000
_cell_angle_gamma 89.8113250000
_cell_volume 987.8667930249

```

```

_symmetry_space_group_name_H-M "P 1"
_symmetry_Int_Tables_number 1
_space_group.reference_setting '001:P 1'
_space_group.transform_Pp_abc a,b,c;0,0,0

```

```

loop_
_space_group_symop_id
_space_group_symop_operation_xyz
1 x,y,z

```

```

loop_
_atom_type_symbol
Li
P
S
I

```

```

loop_
_atom_site_label
_atom_site_type_symbol
_atom_site_symmetry_multiplicity
_atom_site_Wyckoff_symbol
_atom_site_fract_x
_atom_site_fract_y
_atom_site_fract_z
_atom_site_occupancy
_atom_site_fract_symmform

```

|      |    |   |   |               |               |               |              |          |
|------|----|---|---|---------------|---------------|---------------|--------------|----------|
| Li1  | Li | 1 | a | -0.0213460000 | 0.6814070000  | 0.3055050000  | 1.0000000000 | Dx,Dy,Dz |
| Li2  | Li | 1 | a | 0.5314930000  | 0.7751440000  | 0.2649810000  | 1.0000000000 | Dx,Dy,Dz |
| Li3  | Li | 1 | a | 0.7289310000  | 0.7818970000  | 0.4761260000  | 1.0000000000 | Dx,Dy,Dz |
| Li4  | Li | 1 | a | 0.8179110000  | 0.7813000000  | 0.0249060000  | 1.0000000000 | Dx,Dy,Dz |
| Li5  | Li | 1 | a | 0.7914040000  | -0.0231190000 | 0.2267190000  | 1.0000000000 | Dx,Dy,Dz |
| Li6  | Li | 1 | a | 0.7059000000  | 0.5280560000  | 0.1932650000  | 1.0000000000 | Dx,Dy,Dz |
| Li7  | Li | 1 | a | 0.4888090000  | 0.7851700000  | 0.7222670000  | 1.0000000000 | Dx,Dy,Dz |
| Li8  | Li | 1 | a | 0.0374930000  | 0.6889280000  | 0.7034230000  | 1.0000000000 | Dx,Dy,Dz |
| Li9  | Li | 1 | a | 0.2994710000  | 0.7099460000  | -0.0237370000 | 1.0000000000 | Dx,Dy,Dz |
| Li10 | Li | 1 | a | 0.2840940000  | 0.7865790000  | 0.5244930000  | 1.0000000000 | Dx,Dy,Dz |
| Li11 | Li | 1 | a | 0.2043050000  | -0.0348100000 | 0.8077280000  | 1.0000000000 | Dx,Dy,Dz |
| Li12 | Li | 1 | a | 0.2960250000  | 0.5147700000  | 0.7691350000  | 1.0000000000 | Dx,Dy,Dz |
| Li13 | Li | 1 | a | 0.4912710000  | 0.2090010000  | 0.3009660000  | 1.0000000000 | Dx,Dy,Dz |
| Li14 | Li | 1 | a | 0.0397500000  | 0.2071060000  | 0.2091960000  | 1.0000000000 | Dx,Dy,Dz |
| Li15 | Li | 1 | a | 0.2148170000  | 0.2916800000  | 0.4723360000  | 1.0000000000 | Dx,Dy,Dz |
| Li16 | Li | 1 | a | 0.3179380000  | 0.2720700000  | 0.0244300000  | 1.0000000000 | Dx,Dy,Dz |
| Li17 | Li | 1 | a | 0.2859580000  | 0.4763840000  | 0.2237210000  | 1.0000000000 | Dx,Dy,Dz |
| Li18 | Li | 1 | a | 0.2798880000  | 0.0181450000  | 0.2784050000  | 1.0000000000 | Dx,Dy,Dz |
| Li19 | Li | 1 | a | -0.0048750000 | 0.2789840000  | 0.7255260000  | 1.0000000000 | Dx,Dy,Dz |
| Li20 | Li | 1 | a | 0.5454890000  | 0.1854390000  | 0.6911010000  | 1.0000000000 | Dx,Dy,Dz |
| Li21 | Li | 1 | a | 0.7932860000  | 0.2239230000  | -0.0233150000 | 1.0000000000 | Dx,Dy,Dz |
| Li22 | Li | 1 | a | 0.8026320000  | 0.3046840000  | 0.5226100000  | 1.0000000000 | Dx,Dy,Dz |
| Li23 | Li | 1 | a | 0.7021430000  | 0.4652270000  | 0.8010740000  | 1.0000000000 | Dx,Dy,Dz |
| Li24 | Li | 1 | a | 0.8061030000  | 0.0200120000  | 0.7836600000  | 1.0000000000 | Dx,Dy,Dz |
| P1   | P  | 1 | a | 0.0104180000  | 0.4957420000  | 0.0026040000  | 1.0000000000 | Dx,Dy,Dz |
| P2   | P  | 1 | a | 0.5105310000  | 0.4971480000  | 0.4985320000  | 1.0000000000 | Dx,Dy,Dz |
| P3   | P  | 1 | a | 0.5115870000  | -0.0029800000 | -0.0037730000 | 1.0000000000 | Dx,Dy,Dz |
| P4   | P  | 1 | a | 0.0088030000  | -0.0046560000 | 0.5010680000  | 1.0000000000 | Dx,Dy,Dz |
| S1   | S  | 1 | a | 0.1171050000  | 0.8734230000  | 0.3750890000  | 1.0000000000 | Dx,Dy,Dz |
| S2   | S  | 1 | a | 0.8899420000  | 0.1217310000  | 0.3872690000  | 1.0000000000 | Dx,Dy,Dz |
| S3   | S  | 1 | a | 0.1226360000  | 0.6229350000  | 0.1173470000  | 1.0000000000 | Dx,Dy,Dz |
| S4   | S  | 1 | a | 0.8902110000  | 0.3812960000  | 0.1276000000  | 1.0000000000 | Dx,Dy,Dz |
| S5   | S  | 1 | a | 0.7605860000  | 0.7470540000  | 0.2492150000  | 1.0000000000 | Dx,Dy,Dz |
| S6   | S  | 1 | a | 0.6358160000  | 0.8750260000  | 0.8863610000  | 1.0000000000 | Dx,Dy,Dz |
| S7   | S  | 1 | a | 0.3944750000  | 0.1097190000  | 0.8677050000  | 1.0000000000 | Dx,Dy,Dz |
| S8   | S  | 1 | a | 0.6284080000  | 0.6127000000  | 0.6197830000  | 1.0000000000 | Dx,Dy,Dz |
| S9   | S  | 1 | a | 0.3977910000  | 0.3665680000  | 0.6142090000  | 1.0000000000 | Dx,Dy,Dz |
| S10  | S  | 1 | a | 0.2601860000  | 0.7448480000  | 0.7511330000  | 1.0000000000 | Dx,Dy,Dz |
| S11  | S  | 1 | a | 0.6316090000  | 0.3851020000  | 0.3754220000  | 1.0000000000 | Dx,Dy,Dz |
| S12  | S  | 1 | a | 0.3869040000  | 0.6185210000  | 0.3841980000  | 1.0000000000 | Dx,Dy,Dz |
| S13  | S  | 1 | a | 0.6237080000  | 0.1192150000  | 0.1165670000  | 1.0000000000 | Dx,Dy,Dz |
| S14  | S  | 1 | a | 0.3834260000  | 0.8822970000  | 0.1132040000  | 1.0000000000 | Dx,Dy,Dz |
| S15  | S  | 1 | a | 0.2656700000  | 0.2464290000  | 0.2507540000  | 1.0000000000 | Dx,Dy,Dz |
| S16  | S  | 1 | a | 0.1351750000  | 0.3739880000  | 0.8923420000  | 1.0000000000 | Dx,Dy,Dz |
| S17  | S  | 1 | a | 0.8876130000  | 0.6069070000  | 0.8778670000  | 1.0000000000 | Dx,Dy,Dz |
| S18  | S  | 1 | a | 0.1355900000  | 0.1071870000  | 0.6168900000  | 1.0000000000 | Dx,Dy,Dz |
| S19  | S  | 1 | a | 0.8936360000  | 0.8719570000  | 0.6223310000  | 1.0000000000 | Dx,Dy,Dz |
| S20  | S  | 1 | a | 0.7638410000  | 0.2464970000  | 0.7472940000  | 1.0000000000 | Dx,Dy,Dz |
| I1   | I  | 1 | a | -0.0048280000 | 0.0063380000  | 0.0041820000  | 1.0000000000 | Dx,Dy,Dz |

|    |   |   |   |              |               |              |              |          |
|----|---|---|---|--------------|---------------|--------------|--------------|----------|
| I2 | I | 1 | a | 0.5072000000 | -0.0195480000 | 0.4889120000 | 1.0000000000 | Dx,Dy,Dz |
| I3 | I | 1 | a | 0.4957670000 | 0.4987270000  | 0.0009440000 | 1.0000000000 | Dx,Dy,Dz |
| I4 | I | 1 | a | 0.0173020000 | 0.4879060000  | 0.5104290000 | 1.0000000000 | Dx,Dy,Dz |

# end of cif
